# Supplementary material for: Carbon monoxide protonation in condensed phases and bonding to surface superacidic Brønsted centers
Source: Royal Society of Chemistry journal article supplement (doi:10.1039/c5cp07441j), 2016-01-01
Supplement: c5cp07441j1.pdf [file c5cp07441j1.pdf]

## Supporting Information

for

### Carbon Monoxide Protonation in Condensed Phases and Bonding to Surface Superacidic Brønsted Centers

Evgenii S Stoyanov<sup>\*a,b</sup> and Sergei E. Malykhin<sup>b,c</sup>

<sup>a</sup> Vorozhtsov Institute of Organic Chemistry, Siberian Branch of Russian Academy of Sciences (SB RAS), Novosibirsk 630090, Russia

<sup>b</sup> Department of Natural Science, National Research University - Novosibirsk State University, Novosibirsk 630090, Russia

<sup>c</sup> Borekov Institute of Catalysis SB RAS, Novosibirsk 630090, Russia

| Content                                                                                                                                                         | Page No. |
|-----------------------------------------------------------------------------------------------------------------------------------------------------------------|----------|
| 1. Supplemental figures                                                                                                                                         | S2       |
| 2. Supplemental Tables                                                                                                                                          | S5       |
| 3. Calculations                                                                                                                                                 | S6       |
| 3.1 Estimation of the energy of L–H <sup>+</sup> CO and COH <sup>+</sup> –L compounds and barrier for proton transfer from the Brønsted acid to the CO molecule | S6       |
| 3.2 Scan of the potential energy surface when CO approaching to ArH <sup>+</sup> via C atom                                                                     | S8       |
| 3.3 Evaluation of the different functional effect, such as B3LYP, M06, PW91, on the vibration frequencies of H <sup>+</sup> CO and COH <sup>+</sup> cations     | S8       |
| 3.4. Others                                                                                                                                                     | S9       |

## 1. Supplemental Figures

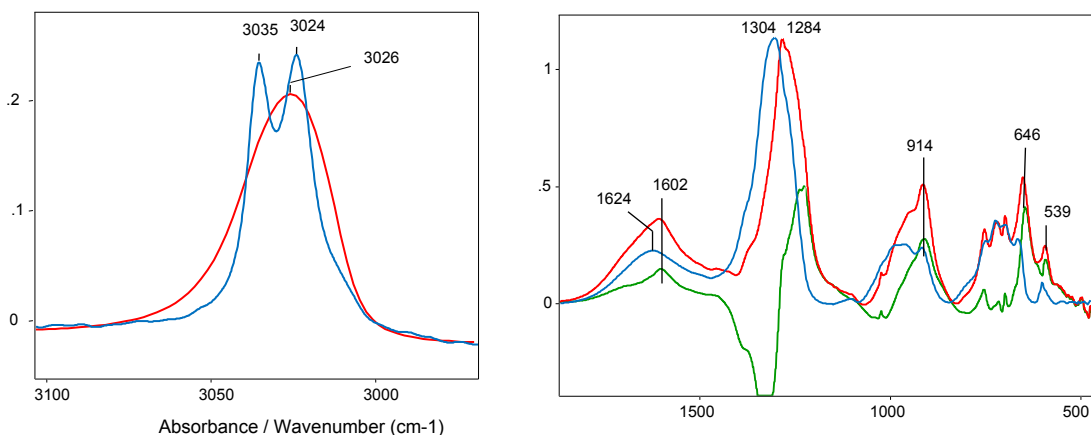

Figure S1. IR spectra of the  $\text{H}\{\text{F}_{11}\}$  acid: a powder precipitated from liquid HCl with mostly crystalline structure (red) and the sublimed film, mostly amorphous (blue). Their difference (green) shows that the bands at 1624/1602, 914 and 646  $\text{cm}^{-1}$  corresponding to bridged hydrogen vibrations differ substantially.  $\nu\text{CH}$  frequencies of the  $\{\text{F}_{11}^{-}\}$  anion (left) at 3000–3500  $\text{cm}^{-1}$  also differ, pointing to their differences in bonding with a proton. The B–B and B–F stretches of the  $\{\text{F}_{11}^{-}\}$  anion are  $\sim 1280\text{--}1300\text{ cm}^{-1}$ .

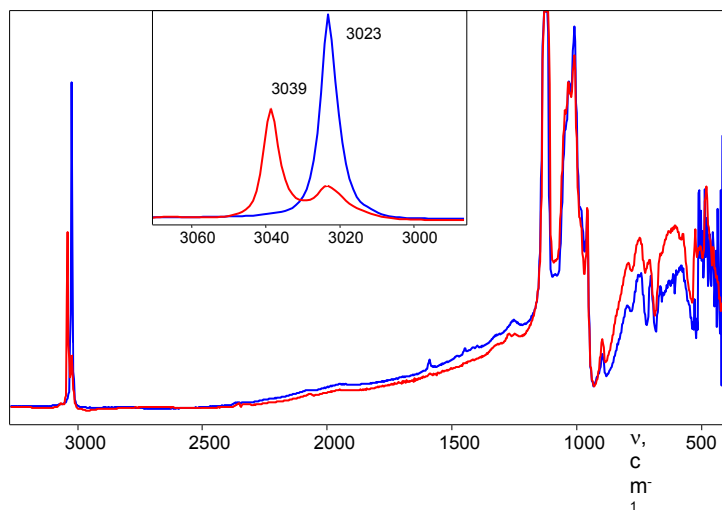

Figure S2. IR spectra of the  $\text{H}\{\text{Cl}_{11}\}$  acid: red is the powder precipitated from liquid HCl and mostly crystalline, studied by X-ray analysis; blue is sublimed film.  $\nu\text{CH}$  frequencies of the  $\{\text{Cl}_{11}^{-}\}$  anion are shown in the inset; (b) the B–B and B–Cl stretches of the  $\{\text{Cl}_{11}^{-}\}$  anion are in the range 1125–960  $\text{cm}^{-1}$ , and strong broad adsorption corresponding to H atom vibrations is at 1250–400  $\text{cm}^{-1}$ .

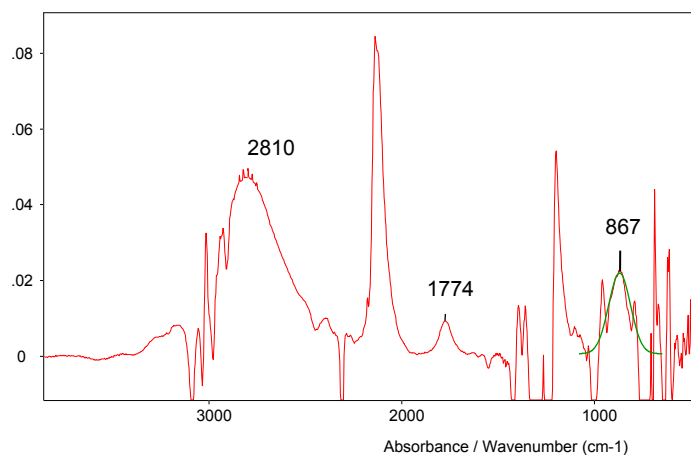

Figure S3. An IR spectrum of the equilibrium mixture of  $\text{IIb} \leftrightarrow \text{OIIb}$ , which was consumed within the first minute of the reaction with  $\text{CH}_3\text{Cl}$ . The spectrum was obtained as a difference of the spectra of compounds  $\text{II}$  and  $\text{OII}$  before and 1 min after injection of gaseous  $\text{CH}_3\text{Cl}$ . Subtraction was carried out with full compensation of the absorption of the  $\{\text{F}_{11}^-\}$  anion and methyl chloride. Negative absorption corresponds to the formed  $\text{CH}_3\text{CO}^+$ .

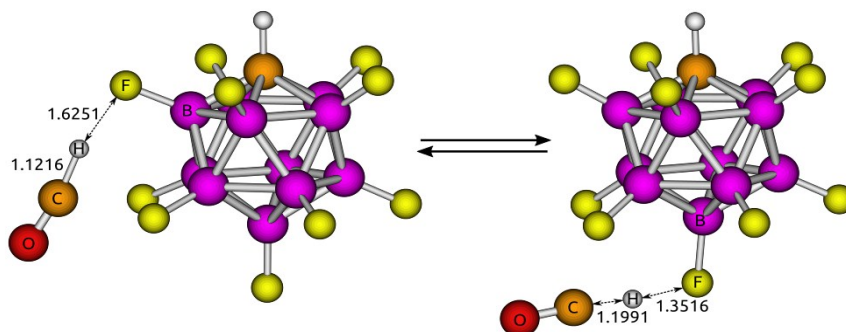

Figure S4. Optimized structures of  $\text{OC}\cdot\text{H}\{\text{F}_{11}\}$  isomers “a” (left) and “c” (right) at the B3LYP/6-311g(df,p) level of theory.

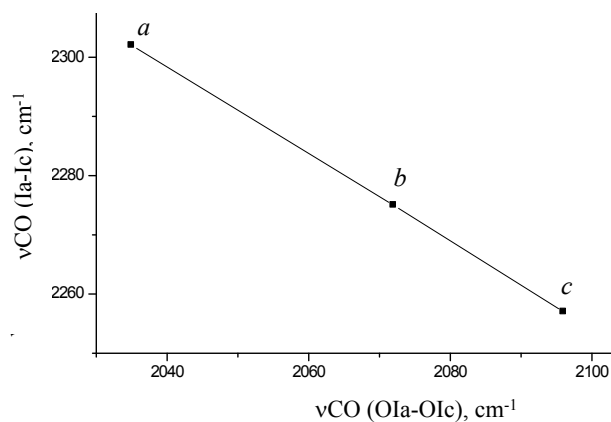

Figure S5. Correlation between  $\nu_{\text{CO}}$  of compounds Ia, Ib, and Ic and that of the corresponding OIa, OIb, and OIc compounds.

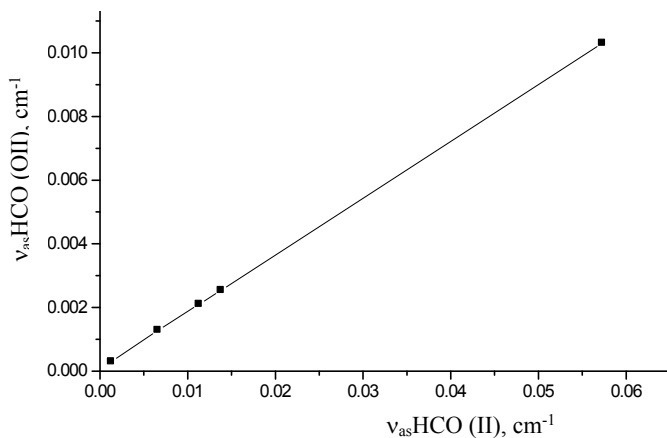

Figure S6 Dependence of the intensity of the band  $\nu_{\text{asHCO}}$  at  $1774 \text{ cm}^{-1}$  of the type OII cation  $\text{COH}^+$  on intensity of  $\nu_{\text{asHCO}}$  absorption at  $2810 \text{ cm}^{-1}$  of the type II cation.

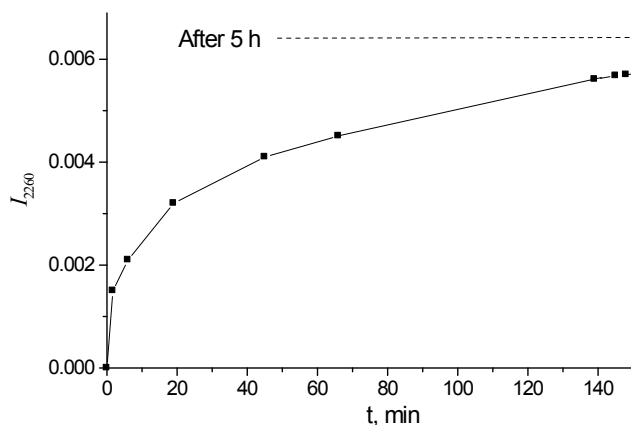

Figure S7. The kinetics of formation of the Ic compound (dependence of the intensity of its  $\nu_{\text{CO}}$  band at  $2260 \text{ cm}^{-1}$  on the duration of absorption of CO by the surface of  $\text{H}\{\text{Cl}_{11}\}$ ).

## 2. Supplemental Tables

Table S1. Calculated IR frequencies, intrinsic frequencies and C–O/C–H distances for optimized (by the B3LYP/cc-pVQZ level of theory) structures of COH<sup>+</sup>...L cations, analogs of the II type compounds (frequencies in cm<sup>-1</sup> are rounded to integer values).

| Cation                                                             | $\nu_{\text{asHCO}}/\nu_{\text{CH}}$ | $\nu_{\text{OHL}}$<br>Bridged H | $\nu_{\text{sHCO}}/\nu_{\text{CO}}$ | $\nu_{\text{iCH}}$ | $\nu_{\text{iCO}}$ | $R_{\text{C}\cdots\text{O}}$ , Å | $R_{\text{C}\cdots\text{H}}$ , Å |
|--------------------------------------------------------------------|--------------------------------------|---------------------------------|-------------------------------------|--------------------|--------------------|----------------------------------|----------------------------------|
| OCH <sup>+</sup>                                                   | 3206.6                               | -                               | 2266.5                              | 3103               | 2407               | 1.1004                           | 1.0950                           |
| OCH <sup>+</sup> ...He                                             | 3162                                 | -                               | 2259                                | 3056               | 2406               | 1.1005                           | 1.0981                           |
| OCH <sup>+</sup> ...Ne                                             | 3108                                 | -                               | 2249                                | 2998               | 2404               | 1.1007                           | 1.1021                           |
| OCH <sup>+</sup> ...Ar                                             | 2874                                 | -                               | 2178                                | 2738               | 2396               | 1.1017                           | 1.1214                           |
| OCH <sup>+</sup> ...{F <sub>11</sub> <sup>-</sup> } <sub>(a)</sub> | 2786                                 | -                               | 2120                                |                    |                    | 1.1102                           | 1.1216                           |
| OCH <sup>+</sup> ...{F <sub>11</sub> <sup>-</sup> } <sub>(b)</sub> | -                                    | 1864                            | 2515                                |                    |                    | 1.1094                           | 1.1640                           |
| OCH <sup>+</sup> ...{F <sub>11</sub> <sup>-</sup> } <sub>(c)</sub> | -                                    | 1587                            | 2441                                |                    |                    | 1.1094                           | 1.1991                           |

Table S2. Calculated CO stretches and C–O distances for optimized (by the B3LYP/cc-pVQZ level of theory) structures of LH<sup>+</sup>...(CO) compounds, analogs of I/OI-type compounds (frequencies in cm<sup>-1</sup> are rounded to the integer values).

| Compound                                         | $\nu_{\text{CO}}$ | $R_{\text{C}\cdots\text{O}}$ , Å | Notes     |
|--------------------------------------------------|-------------------|----------------------------------|-----------|
| CO <sub>gas</sub>                                | 2214              | 1.12375                          | Reference |
| H <sub>2</sub> OH <sup>+</sup> ...CO             | 2321              | 1.1125                           | I type    |
| SO <sub>2</sub> H <sup>+</sup> ...CO             | 2325              | 1.1123                           |           |
| C <sub>2</sub> H <sub>3</sub> <sup>+</sup> ...CO | 2297              | 1.1146                           |           |
| H <sub>2</sub> OH <sup>+</sup> ...OC             | 2131              | 1.1341                           | OI type   |
| HFH <sup>+</sup> ...OC                           | 2102              | 1.1406                           |           |

Table S3. Calculated IR frequencies, intrinsic frequencies ( $\nu_{\text{i}}$ ), and C–O/C–H distances for optimized (by the B3LYP/cc-pVQZ level of theory) structures of COH<sup>+</sup>... L cations, analogs of OII-type compounds (frequencies in cm<sup>-1</sup> are rounded to the integer values).

| Cation                 | $\nu_{\text{CH}}$ | $\nu_{\text{OHL}}$<br>Bridged H | $\nu_{\text{CO}}$ | $\nu_{\text{iCH}}$ | $\nu_{\text{iCO}}$ | $R_{\text{C}\cdots\text{O}}$ , Å | $R_{\text{O}\cdots\text{H}}$ , Å |
|------------------------|-------------------|---------------------------------|-------------------|--------------------|--------------------|----------------------------------|----------------------------------|
| COH <sup>+</sup>       | 3407              |                                 | 1965              | 3103               | 2407               | 1.1529                           | 0.9948                           |
| COH <sup>+</sup> ...He | 3070              |                                 | 1978              | 3956               | 2406               | 1.1510                           | 1.0122                           |
| COH <sup>+</sup> ...Ne | 2919              |                                 | 1984              | 2998               | 2404               | 1.1502                           | 1.0216                           |
| CO-H <sup>+</sup> -Ar  |                   | 1758                            | 2198              | 2738               | 2396               | 1.1466                           | 1.0968                           |
| CO-H <sup>+</sup> -FH  |                   | 1612                            | 2102              |                    |                    | 1.1406                           | 1.2692                           |

### 3. Calculations

#### 3.1. Estimation of the energy of L–H<sup>+</sup>CO and COH<sup>+</sup>–L compounds and barrier for proton transfer from the Bronsted acid to the CO molecule.

To make the accurate estimation of the energy of H<sup>+</sup>CO/COH<sup>+</sup> cations binding with basic molecules, the CBS-QB3 quantum-chemical method was applied. It is a Complete Basis Set (CBS) developed by George Peterson and coworkers [J.A. Montgomery, M.J. Frisch, J.W. Ochterski, and G.A. Petersson, J. Chem. Phys. 110 (1999) 2822-2827]. The several single-point energies were extrapolated in order to get the best estimate of the total energy. It is hard to compute due to an incomplete electron correlation energy account and finite size of the basis set. The CBS-QB3 calculations were performed with the Gaussian 09 software [Gaussian 09, Revision D.01, M.J. Frisch, G.W. Trucks, H.B. Schlegel, G.E. Scuseria, M.A. Robb, J.R. Cheeseman, G. Scalmani, V. Barone, B. Mennucci, G.A. Petersson, H. Nakatsuji, M. Caricato, X. Li, H.P. Hratchian, A.F. Izmaylov, J. Bloino, G. Zheng, J.L. Sonnenberg, M. Hada, M. Ehara, K. Toyota, R. Fukuda, J. Hasegawa, M. Ishida, T. Nakajima, Y. Honda, O. Kitao, H. Nakai, T. Vreven, J.A. Montgomery, Jr., J.E. Peralta, F. Ogliaro, M. Bearpark, J.J. Heyd, E. Brothers, K.N. Kudin, V.N. Staroverov, R. Kobayashi, J. Normand, K. Raghavachari, A. Rendell, J.C. Burant, S.S. Iyengar, J. Tomasi, M. Cossi, N. Rega, J.M. Millam, M. Klene, J.E. Knox, J.B. Cross, V. Bakken, C. Adamo, J. Jaramillo, R. Gomperts, R.E. Stratmann, O. Yazyev, A.J. Austin, R. Cammi, C. Pomelli, J.W. Ochterski, R.L. Martin, K. Morokuma, V.G. Zakrzewski, G.A. Voth, P. Salvador, J.J. Dannenberg, S. Dapprich, A.D. Daniels, Ö. Farkas, J.B. Foresman, J.V. Ortiz, J. Cioslowski, and D.J. Fox, Gaussian, Inc., Wallingford CT, 2009]. The results are shown in Table 1.

Table S4. Calculated enthalpies (in kJ/mol) of the H<sup>+</sup>CO/H<sup>+</sup>OC binding with various ligands, L (basicity of Ar and {F<sub>11</sub><sup>-</sup>} is very close).

|                     | He   | Ne    | Ar    | HF     | C <sub>2</sub> H <sub>2</sub> | SO <sub>2</sub> | H <sub>2</sub> O |
|---------------------|------|-------|-------|--------|-------------------------------|-----------------|------------------|
| L–H <sup>+</sup> CO | -1.8 | -6.0  | -19.7 | -67.4  | -84.4                         | -103.2          | -157.1           |
| L–H <sup>+</sup> OC | -7.3 | -15.3 | -51.2 | -135.9 | -229.6                        | -234.2          | -292.2           |

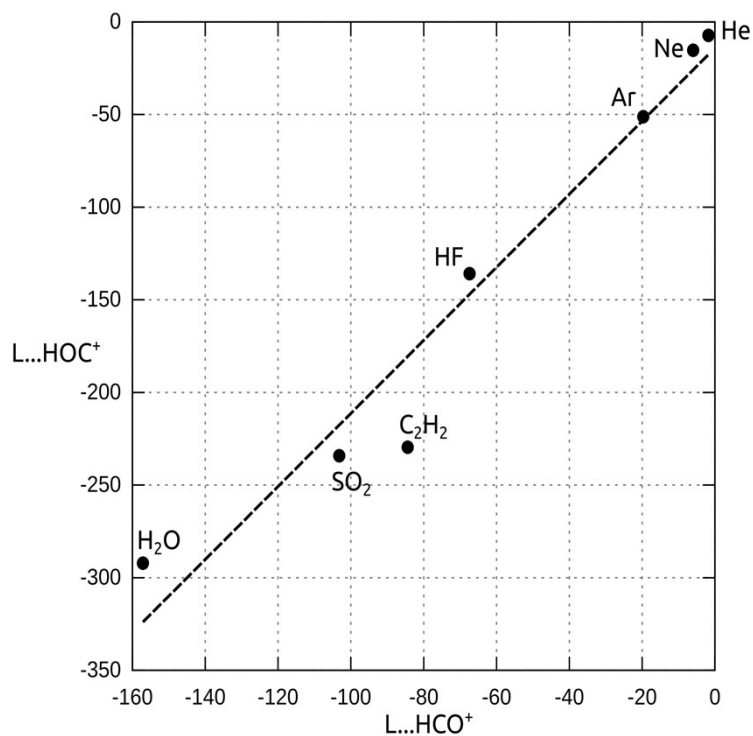

Figure S7. Correlation between binding enthalpies of HCO<sup>+</sup> and HOC<sup>+</sup> (kJ/mol).

According to CBS-QB3 calculation, the ArH<sup>+</sup> interaction with CO with the formation of Ar..H<sup>+</sup>CO, is highly exothermic – 234.4 kJ/mol. It is expected that the barrier of proton transfer should be very low, because of perfect energy compensation between the breaking of the Ar-H bond and formation of the C-H bond. In fact, the scan of Potential Energy Surface (PES) along Ar-H distance shows no energetic barrier. The ArH<sup>+</sup> acid is the best model to describe the interaction of {F<sub>11</sub><sup>-</sup>}H<sup>+</sup> acid with CO molecules, because of comparable basicity of Ar and {F<sub>11</sub><sup>-</sup>} anion. Therefore, it can be expected that in case of a real {F<sub>11</sub><sup>-</sup>}H<sup>+</sup> acid the noticeable barrier to CO protonation also does not exist.

### 3.2. Scan of the potential energy surface when CO approaching to ArH<sup>+</sup> via C atom

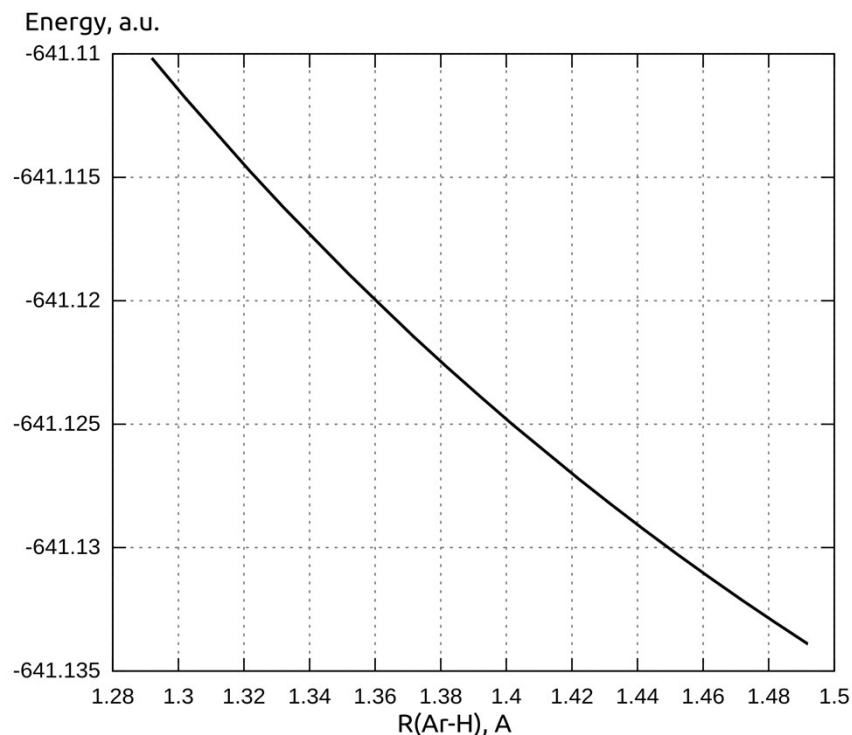

Figure S8. Relaxed molecule PES scan along the Ar-H distance as CO molecule approaching to the ArH<sup>+</sup> cation.

### 3.3. Evaluation of the different functional effect, such as B3LYP, M06, PW91, on the vibration frequencies of H<sup>+</sup>CO and COH<sup>+</sup> cations

Table S5. IR frequencies of H<sup>+</sup>CO calculated with various DFT functionals.

|      | SVWN    | PW91    | B3PW91  | B3LYP   | B2PLYP  | M06L    | M06     | M06-2X  |
|------|---------|---------|---------|---------|---------|---------|---------|---------|
| vCH  | 3111.37 | 3144.35 | 3216.77 | 3224.97 | 3217.49 | 3206.77 | 3141.75 | 3261.86 |
| vCO  | 2223.52 | 2188.84 | 2273.37 | 2265.78 | 2204.68 | 2254.12 | 2279.68 | 2337.55 |
| δHCO | 819.49  | 830.79  | 867.62  | 867.21  | 858.30  | 894.56  | 901.96  | 887.14  |

Table S6. IR frequencies of COH<sup>+</sup> calculated with various DFT functionals.

|      | SVWN    | PW91    | B3PW91  | B3LYP   | B2PLYP  | M06L    | M06     | M06-2X  |
|------|---------|---------|---------|---------|---------|---------|---------|---------|
| vOH  | 3282.61 | 3316.13 | 3436.24 | 3401.31 | 3425.90 | 3456.46 | 3464.87 | 3449.34 |
| vCO  | 1942.93 | 1891.89 | 1970.51 | 1965.08 | 1948.20 | 1982.48 | 2001.28 | 2009.54 |
| δHCO | 284.98  | 215.26  | 200.93  | 184.48  | 160.77  | 256.91  | 259.65  | 280.86  |



### 3.4. Others

Example of the GAMESS US input for DFT calculation for Ar...H<sup>+</sup>CO cation. It shows all parameters required to reproduce results in the present Manuscript. Note that DFTTYP=B3LYPV1R selected for the convenience if one wants to reproduce results using Gaussian 09 software.

```
$SYSTEM TIMLIM=1000 MWORDS=50 MEMDDI=30 $END
$CONTRL SCFTYP=RHF
  RUNTYP=OPTIMIZE EXETYP=RUN
  MULT=1 ICHARG=1 ISPHER=1
  DFTTYP=B3LYPV1R
  COORD=UNIQUE NZVAR=5
$END
$DFT SWOFF=0.0 JANS=2 $END
$GUESS GUESS=HUCKEL $END
$SCF DIIS=.TRUE. SHIFT=.T. ETHRSH=0.1 SWDIIS=0.0 $END
$FORCE RDHESS=.F. DECOMP=.T. PURIFY=.T. $END
$ZMAT IZMAT(1)=1,1,2, 1,2,3, 1,3,4, 5,1,2,3, 5,2,3,4 $END
$LIBE APTS(1)=1.0,0.0,0.0, 1.0,0.0,0.0 $END
$STATPT NPRT=-1 HSSEND=.T. $END
$BASIS GBASIS=CCQ $END
$DATA
COH+
CNV 4

O          8.0    0.0000000000    0.0000000000   -1.0958457359
C          6.0   -0.0000000000    0.0000000000    0.0057741388
H          1.0   -0.0000000000    0.0000000000    1.1281379068
AR         18.0    0.0000000000    0.0000000000    3.2020894711
$END
```

Optimized geometries at B3LYP/cc-VQZ level (Cartesian coordinates, A) and total energies (a.u.) for the L+HOC and L+HCO cations are listed below.

```
COH          E = -113.5393377
C            0.0000000000    0.0000000000   -0.0367682523
O            0.0000000000    0.0000000000    1.1161509183
H            0.0000000000    0.0000000000    2.1109823723

COH+He      E = -116.4592564
C            0.0000000000    0.0000000000   -0.0384038391
O           -0.0000000000    0.0000000000   -1.1894442666
H           -0.0000000000    0.0000000000   -2.2016418937
HE           0.0000000000    0.0000000000   -3.5924505611

COH+Ne      E = -242.5234473
C           -0.0000000000    0.0000000000   -0.1285337571
O            0.0000000000    0.0000000000   -1.2787285725
```

|                      |                  |               |               |
|----------------------|------------------|---------------|---------------|
| H                    | 0.0000000000     | 0.0000000000  | -2.3003608789 |
| NE                   | -0.0000000000    | 0.0000000000  | -3.8294097712 |
| COH+Ar               | E = -641.1232020 |               |               |
| C                    | 0.0000000000     | 0.0000000000  | -0.0619742336 |
| O                    | -0.0000000000    | 0.0000000000  | -1.2085427880 |
| H                    | -0.0000000000    | 0.0000000000  | -2.3053465642 |
| AR                   | 0.0000000000     | 0.0000000000  | -3.9885226262 |
| COH+H <sub>2</sub> O | E = -190.1267176 |               |               |
| O                    | -0.0212294787    | 0.7968781004  | 0.0000000000  |
| C                    | 0.0077769515     | 1.9306478553  | 0.0000000000  |
| H                    | 0.0090125104     | -0.8434817059 | 0.0000000000  |
| H                    | -0.2729072033    | -2.2612213575 | -0.8091732915 |
| H                    | -0.2729072033    | -2.2612213575 | 0.8091732915  |
| O                    | 0.0796852741     | -1.8462793182 | 0.0000000000  |
| HCO+                 | E = -113.6011750 |               |               |
| O                    | 0.0000000000     | 0.0000000000  | -1.1004597675 |
| C                    | 0.0000000000     | 0.0000000000  | -0.0000946106 |
| H                    | 0.0000000000     | 0.0000000000  | 1.0948615508  |
| HCO+He               | E = -116.5176347 |               |               |
| O                    | -0.0000000000    | 0.0000000000  | -1.0993978890 |
| C                    | 0.0000000000     | 0.0000000000  | 0.0011503476  |
| H                    | 0.0000000000     | 0.0000000000  | 1.0992557025  |
| HE                   | -0.0000000000    | 0.0000000000  | 2.9421918768  |
| HCO+Ne               | E = -242.5802384 |               |               |
| O                    | -0.0000000000    | 0.0000000000  | -1.0098347701 |
| C                    | 0.0000000000     | 0.0000000000  | 0.0908763478  |
| H                    | 0.0000000000     | 0.0000000000  | 1.1929382361  |
| NE                   | -0.0000000000    | 0.0000000000  | 3.0746151215  |
| HCO+Ar               | E = -641.1728738 |               |               |
| O                    | -0.0000000000    | 0.0000000000  | -1.1005394329 |
| C                    | 0.0000000000     | 0.0000000000  | 0.0011891801  |
| H                    | 0.0000000000     | 0.0000000000  | 1.1226302885  |
| AR                   | -0.0000000000    | 0.0000000000  | 3.2054850223  |
| HCO+H <sub>2</sub> O | E = -190.1375961 |               |               |
| O                    | -0.0010585400    | 1.9437527500  | 0.0000000000  |
| C                    | -0.0118407900    | 0.8313043600  | 0.0000000000  |
| H                    | -0.0025100200    | -0.8365989200 | 0.0000000000  |
| H                    | -0.2662259700    | -2.3126785600 | -0.8041740000 |
| H                    | -0.2662259700    | -2.3126785600 | 0.8041740000  |
| O                    | 0.0768093800     | -1.8844865100 | 0.0000000000  |

|        |                  |              |               |
|--------|------------------|--------------|---------------|
| HF+HCO | E = -214.1273977 |              |               |
| C      | -0.0025580098    | 0.0000000000 | 0.0140681992  |
| O      | 0.1219238751     | 0.0000000000 | 1.1099683223  |
| H      | -0.1308327208    | 0.0000000000 | -1.1303756439 |
| F      | -0.0536820083    | 0.0000000000 | -2.6221831488 |
| H      | -0.6931900424    | 0.0000000000 | -3.3041734339 |

|        |                  |               |              |
|--------|------------------|---------------|--------------|
| HF+HOC | E = -214.0917791 |               |              |
| F      | 1.6996367067     | 0.1443539641  | 0.0000000000 |
| H      | 0.6066700438     | 0.0117149434  | 0.0000000000 |
| C      | -1.8018790406    | 0.0043091366  | 0.0000000000 |
| O      | -0.6617943413    | -0.0311890454 | 0.0000000000 |
| H      | 2.2312641214     | -0.6425369888 | 0.0000000000 |

|                                    |                  |               |               |
|------------------------------------|------------------|---------------|---------------|
| C <sub>2</sub> H <sub>2</sub> +HCO | E = -191.0041173 |               |               |
| O                                  | 0.0000000000     | 0.0000000000  | 2.3590460700  |
| C                                  | 0.0000000000     | 0.0000000000  | 1.2444060700  |
| H                                  | 0.0000000000     | 0.0000000000  | -0.6142419300 |
| C                                  | -0.0000000000    | -0.6050090000 | -1.8358099300 |
| C                                  | 0.0000000000     | 0.6050090000  | -1.8358099300 |
| H                                  | 0.0000000000     | 1.6784520000  | -1.8474219300 |
| H                                  | 0.0000000000     | -1.6784520000 | -1.8474219300 |

|                      |                  |               |              |
|----------------------|------------------|---------------|--------------|
| SO <sub>2</sub> +HCO | E = -662.3779061 |               |              |
| H                    | -0.8820010220    | 0.4007781519  | 0.0000000000 |
| C                    | -2.3551063004    | -0.2604923360 | 0.0000000000 |
| O                    | -3.3789863610    | -0.6951370061 | 0.0000000000 |
| O                    | 0.0381513015     | 0.9615931113  | 0.0000000000 |
| O                    | 1.5181420520     | -1.0279289334 | 0.0000000000 |
| S                    | 1.4355280800     | 0.3899908924  | 0.0000000000 |

Optimized geometry at B3LYP/6-311g(3df,3pd) level (Cartesian coordinates, A) and total energy (a.u.) for the (CHB<sub>11</sub>F<sub>11</sub>)-HCO<sup>+</sup> complex.

|              |                   |               |              |
|--------------|-------------------|---------------|--------------|
| CHB11F11+HCO | E = -1525.4422023 |               |              |
| B            | -0.0001712309     | -0.0013674010 | 0.0039823555 |
| B            | 0.0021690122      | -0.0021263760 | 2.9008807604 |
| B            | 1.6951324703      | -0.0020973114 | 2.3796604345 |
| B            | 0.4914841355      | 0.9681909574  | 1.4762649348 |
| B            | 1.6932835653      | -0.0205132047 | 0.5862041852 |
| B            | -0.8137961220     | -1.5444646458 | 0.5573807948 |
| B            | 0.4006891757      | -2.4938918349 | 1.4684052411 |
| B            | -0.7823539204     | -1.5123276764 | 2.3485965472 |
| B            | 0.8938378599      | -1.5155815717 | 2.8746013917 |
| B            | -1.0614992814     | 0.0181412090  | 1.4582594235 |
| B            | 0.8986681019      | -1.5501425582 | 0.0268150866 |
| C            | 1.8170456170      | -1.4898198177 | 1.4927348219 |
| H            | 2.7786929060      | -1.9852136577 | 1.4813458854 |
| F            | 2.7488555666      | 0.4454486772  | 3.0873888100 |

|   |               |               |               |
|---|---------------|---------------|---------------|
| F | 2.7680934323  | 0.4347897327  | -0.0774438507 |
| F | 1.2177945009  | -2.1284658121 | 4.0903289948  |
| F | 0.5263654305  | -3.8328296934 | 1.5228122178  |
| F | 1.4028098329  | -2.1933718949 | -1.0385688189 |
| F | -0.4080725523 | 0.4406665510  | 4.1610381505  |
| F | -1.7037298222 | -2.0534648666 | 3.2489283494  |
| F | -1.7985618813 | -2.1309647874 | -0.1556592746 |
| F | -0.3521018128 | 0.6033563405  | -1.1496935117 |
| F | 0.5125428747  | 2.3178961230  | 1.4712997587  |
| F | -2.2659867928 | 0.6327660241  | 1.4885714967  |
| H | -0.0895616988 | -1.7782940978 | 4.9899041219  |
| C | -1.0693617164 | -1.4198916004 | 5.4016770098  |
| O | -1.9840910143 | -1.1530903030 | 5.9714967466  |
